# Supplementary material for: Identification of lipid-specific proteins with high-density lipid-immobilized beads
Source: Royal Society of Chemistry journal article supplement (doi:10.1039/d4an00579a), 2024-01-01
Supplement: d4an00579a1.pdf [file d4an00579a1.pdf]

## Supplementary Information

### Identification of Lipid-Specific Proteins with High-Density Lipid-Immobilized Beads

Masayuki Morito, Hiroki Yasuda, Takaaki Matsufuji, Masanao Kinoshita, Nobuaki Matsumori\*

Department of Chemistry, Graduate School of Science, Kyushu University, Fukuoka, 819-0395, Japan.

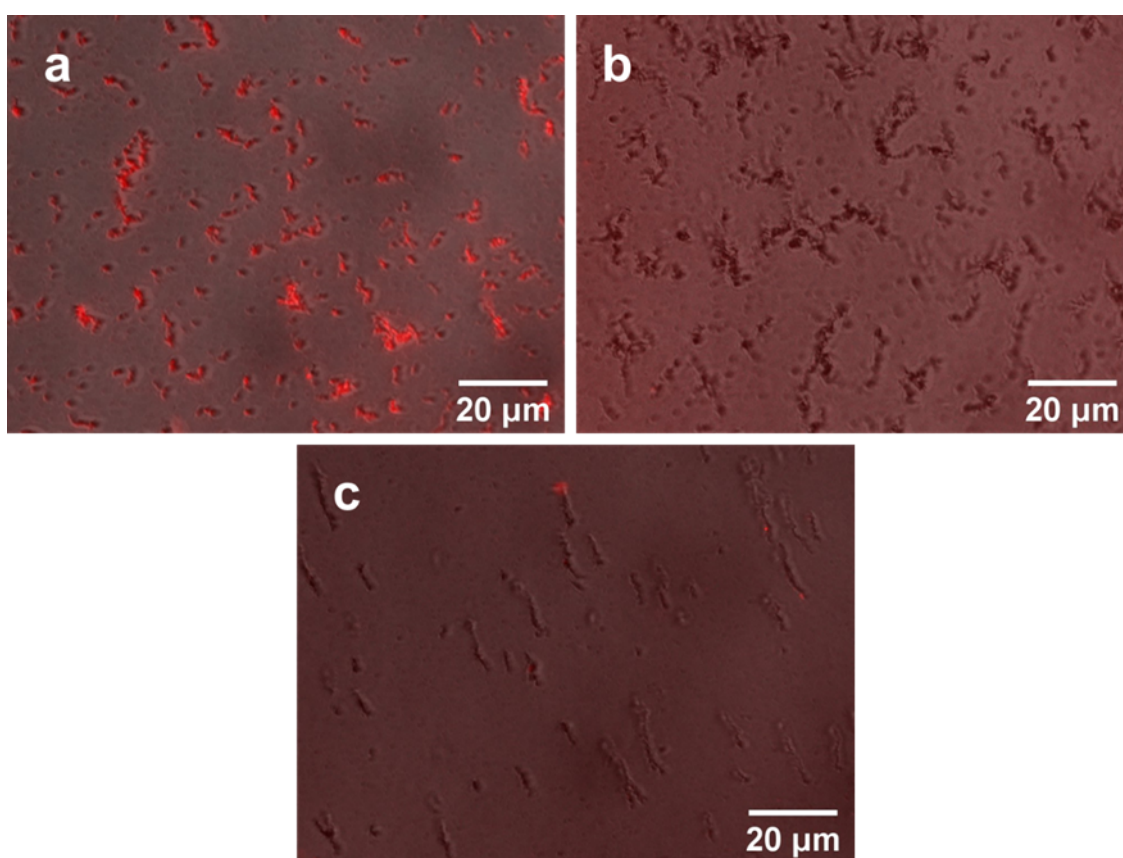

**Figure S1.** Fluorescence images of RFP-lysenin bound to each type of beads (a: SM beads, b: Cer beads, c: control beads). After incubation with RFP-lysenin and washing with PBS, the beads were resuspended in PBS and observed using a fluorescence microscope (BZ-X700, Keyence, Osaka, Japan). RFP-lysenin specifically bound to SM beads and not to the other beads. The brightness and contrast were adjusted for clarity.

**Table S1.** Amount of immobilized SM molecules per milligram of beads ( $x$ ) and an occupation area per SM molecule on the bead surface ( $s$ ).

|         | $x$ (nmol mg <sup>-1</sup> ) | $s$ (Å <sup>2</sup> ) |
|---------|------------------------------|-----------------------|
| 1       | 76.6                         | 49.1                  |
| 2       | 72.5                         | 51.8                  |
| 3       | 70.6                         | 53.2                  |
| Average | 73.2                         | 51.4                  |
| S.D.    | 3.0                          | 2.1                   |

**Table S2.** Identified lipid binding proteins from Neuro2a cells in each band.

### #1 Cer

| <i>Protein name</i>             | <i>Score</i> | <i>Mass</i> | <i>Number of peptides</i> |
|---------------------------------|--------------|-------------|---------------------------|
| Keratin, type I cytoskeletal 42 | 123          | 50444       | 4                         |
| Bone marrow stromal antigen 2   | 91           | 19311       | 3                         |
| Nesprin-2                       | 87           | 787997      | 5                         |

### #2 SM

| <i>Protein name</i>                                 | <i>Score</i> | <i>Mass</i> | <i>Number of peptides</i> |
|-----------------------------------------------------|--------------|-------------|---------------------------|
| Proline-, glutamic acid- and leucine-rich protein 1 | 99           | 119306      | 4                         |
| YLP motif-containing protein 1                      | 80           | 155146      | 4                         |
| GRB10-interacting GYF protein 2                     | 79           | 149387      | 3                         |

### #3 SM

| <i>Protein name</i>         | <i>Score</i> | <i>Mass</i> | <i>Number of peptides</i> |
|-----------------------------|--------------|-------------|---------------------------|
| Tumor protein D54           | 805          | 24085       | 32                        |
| MICOS complex subunit Mic19 | 229          | 26546       | 6                         |
| Vimentin                    | 222          | 53712       | 11                        |
| Peptidase inhibitor 16      | 179          | 54243       | 5                         |

|                                                               |     |        |    |
|---------------------------------------------------------------|-----|--------|----|
| 14-3-3 protein gamma                                          | 178 | 28456  | 11 |
| Iron-sulfur protein NUBPL                                     | 169 | 34402  | 5  |
| Mitochondrial import inner membrane translocase subunit TIM44 | 165 | 51401  | 6  |
| MICOS complex subunit Mic27                                   | 157 | 29356  | 5  |
| Beta-actin-like protein 2                                     | 155 | 42319  | 7  |
| HAUS augmin-like complex subunit 1                            | 154 | 31416  | 8  |
| MICOS complex subunit Mic25                                   | 153 | 30175  | 6  |
| Bone marrow stromal antigen 2                                 | 153 | 19311  | 5  |
| 60S ribosomal protein L24                                     | 139 | 17882  | 3  |
| Calcium-binding mitochondrial carrier protein SCaMC-1         | 134 | 53096  | 4  |
| Transcription initiation factor TFIID subunit 9B              | 133 | 27269  | 5  |
| Single-strand selective monofunctional uracil DNA glycosylase | 127 | 31091  | 4  |
| Dynamin-like 120 kDa protein, mitochondrial                   | 126 | 111783 | 5  |
| 14-3-3 protein sigma                                          | 124 | 27803  | 7  |
| Glutamate--cysteine ligase regulatory subunit                 | 124 | 30858  | 4  |
| Coiled-coil domain-containing protein 127                     | 120 | 30661  | 7  |
| Peripherin OS=Mus musculus                                    | 117 | 54349  | 5  |
| Cytosolic Fe-S cluster assembly factor NUBP2                  | 114 | 29898  | 3  |
| Heat shock protein HSP 90-beta                                | 113 | 83571  | 3  |
| ADP/ATP translocase 1                                         | 112 | 33111  | 6  |
| Proteasome subunit alpha type-3                               | 107 | 28615  | 4  |
| Ras suppressor protein 1                                      | 95  | 31531  | 8  |
| B-cell receptor-associated protein 31                         | 94  | 27996  | 7  |
| Neurosecretory protein VGF                                    | 94  | 68248  | 4  |
| Myeloid leukemia factor 2                                     | 93  | 28094  | 3  |
| Epimerase family protein SDR39U1                              | 91  | 31496  | 3  |

|                                                        |    |       |   |
|--------------------------------------------------------|----|-------|---|
| Keratin, type II cytoskeletal 79                       | 90 | 57802 | 3 |
| Isocitrate dehydrogenase [NADP],<br>mitochondrial      | 87 | 51330 | 3 |
| D-beta-hydroxybutyrate dehydrogenase,<br>mitochondrial | 85 | 38617 | 4 |
| Isocitrate dehydrogenase [NADP]<br>cytoplasmic         | 83 | 47044 | 3 |
| 40S ribosomal protein S17                              | 80 | 15571 | 3 |
| X-linked lymphocyte-regulated protein PM1              | 77 | 24711 | 3 |
| Peroxisomal membrane protein PEX16                     | 75 | 38710 | 5 |
| Tubulin alpha-1A chain                                 | 75 | 50788 | 4 |
| tRNA selenocysteine 1-associated protein 1             | 74 | 32744 | 5 |
| 60S acidic ribosomal protein P0                        | 73 | 34366 | 3 |
| IgE-binding protein                                    | 72 | 63221 | 5 |
| Cytochrome c1, heme protein,<br>mitochondrial          | 67 | 35533 | 3 |
| Myosin light polypeptide 6                             | 65 | 17090 | 3 |
| Proteasome subunit alpha type-1                        | 54 | 29813 | 3 |

#### **#4 Cer**

| <i>Protein name</i>                                      | <i>Score</i> | <i>Mass</i> | <i>Number of peptides</i> |
|----------------------------------------------------------|--------------|-------------|---------------------------|
| Protein FAM3C                                            | 200          | 25022       | 8                         |
| Protein SCO2 homolog, mitochondrial                      | 183          | 29097       | 7                         |
| Bone marrow stromal antigen 2                            | 167          | 19311       | 4                         |
| Membrane-associated progesterone<br>receptor component 2 | 139          | 23434       | 3                         |
| Major prion protein                                      | 133          | 28131       | 4                         |
| Keratin, type II cytoskeletal 2 epidermal                | 126          | 71336       | 6                         |
| Bcl-2 homologous antagonist/killer                       | 123          | 23394       | 7                         |
| Peroxisomal membrane protein 11C                         | 122          | 27533       | 3                         |
| Retinol dehydrogenase 11                                 | 119          | 35525       | 4                         |

|                                                             |     |       |   |
|-------------------------------------------------------------|-----|-------|---|
| Keratin, type I cytoskeletal 15                             | 112 | 49278 | 7 |
| 4F2 cell-surface antigen heavy chain                        | 105 | 58414 | 6 |
| RNA transcription, translation and transport factor protein | 99  | 28249 | 7 |
| MICOS complex subunit Mic60                                 | 98  | 84247 | 5 |
| Keratin, type II cytoskeletal 5                             | 95  | 61957 | 7 |
| Peptidase inhibitor 16                                      | 92  | 54243 | 3 |
| Tubulin beta-5 chain                                        | 90  | 50095 | 3 |
| Melanoregulin                                               | 90  | 25450 | 3 |
| Alpha-internexin                                            | 85  | 55520 | 3 |
| m-AAA protease-interacting protein 1, mitochondrial         | 83  | 33249 | 6 |
| ZW10 interactor                                             | 81  | 28866 | 3 |
| Endoplasmic reticulum chaperone BiP                         | 76  | 72492 | 4 |
| Adenine nucleotide translocase lysine N-methyltransferase   | 75  | 25009 | 3 |
| Alpha-enolase                                               | 74  | 47453 | 3 |
| Keratin, type II cytoskeletal 2 oral                        | 70  | 63319 | 4 |
| Tubulin beta-4B chain                                       | 63  | 50255 | 3 |
| Acyl-protein thioesterase 2                                 | 58  | 25120 | 3 |
| Peroxisomal membrane protein PEX16                          | 53  | 38710 | 3 |

## #5 SM

| <i>Protein name</i>                   | <i>Score</i> | <i>Mass</i> | <i>Number of peptides</i> |
|---------------------------------------|--------------|-------------|---------------------------|
| ATP synthase subunit g, mitochondrial | 273          | 11417       | 13                        |
| Dynein light chain 1, cytoplasmic     | 160          | 10530       | 4                         |
| ATP synthase subunit e, mitochondrial | 144          | 8230        | 6                         |
| Tubulin beta-5 chain                  | 137          | 50095       | 3                         |
| ADP/ATP translocase 2                 | 133          | 33138       | 8                         |
| Enhancer of rudimentary homolog       | 127          | 12422       | 4                         |
| ADP/ATP translocase 1                 | 124          | 33111       | 10                        |
| Keratin, type II cytoskeletal 1       | 124          | 66079       | 4                         |

|                                     |     |       |   |
|-------------------------------------|-----|-------|---|
| Keratin, type I cytoskeletal 16     | 114 | 51973 | 5 |
| Ubiquitin-like protein 5            | 107 | 8655  | 4 |
| Small integral membrane protein 4   | 106 | 9740  | 5 |
| Keratin, type I cytoskeletal 15     | 104 | 49278 | 5 |
| Histone H4                          | 90  | 11360 | 4 |
| 40S ribosomal protein S18           | 85  | 17708 | 4 |
| Cytochrome c oxidase subunit NDUFA4 | 61  | 9321  | 4 |

## Supplementary Methods

### General Method for Synthesis

EggSM was purchased from Avanti Polar Lipids (Alabaster, AL, USA). Sphingosine was purchased from Toronto Research Chemicals (Toronto, Canada). Any other reagents were all purchased from FUJIFILM Wako Pure Chemical Corp. (Osaka, Japan), Tokyo Chemical Inc. (Tokyo, Japan), Nacalai Tesque Inc. (Kyoto, Japan) or Sigma-Aldrich (St. Louis, MO, USA). Thin-layer chromatography was performed on Merck precoated silica gel 60 F-254 plates, which were visualized by UV irradiation (254 nm) or staining with anisaldehyde/sulfuric acid. <sup>1</sup>H NMR spectra were obtained on a JEOL ECA 600 (600 MHz) spectrometer. High-resolution mass spectra (HRMS) were acquired on a Bruker micrOTOF II ESI-TOF mass spectrometer.

### Synthesis of 16-azidohexadecanoic acid (1)

To a solution of 16-bromohexadecanoic acid (394 mg, 1.18 mmol) in DMF (5 mL) was added NaN<sub>3</sub> (115 mg, 1.76 μmol). The reaction mixture was stirred at room temperature overnight and then extracted with ethyl acetate. The organic layer was dried over anhydrous Na<sub>2</sub>SO<sub>4</sub>, filtered, and concentrated *in vacuo*. Purification by silica gel column chromatography (hexane/ethyl acetate 3:1 v/v) afforded a colorless solid (310.8 mg, 1.05 mmol, 89%). R<sub>f</sub> = 0.22 (3/1 hexane/ethyl acetate, v/v), <sup>1</sup>H NMR (600 MHz, CDCl<sub>3</sub>): δ 3.25 (t, J = 7.2 Hz, 2H), 2.34 (t, J = 7.6 Hz, 2H), 1.65-1.57 (m, 4H), 1.37-1.25 (m, 22H), HRMS (*m/z*): [M + H]<sup>+</sup> calcd for C<sub>16</sub>H<sub>31</sub>N<sub>3</sub>NaO<sub>2</sub><sup>+</sup>, 320.2308; found, 320.2313.

### Synthesis of 16-azidohexadecanoic acid NHS easter (2)

To a solution of the azidoacylacid (1) (29.7 mg, 99.8 μmol) in CH<sub>2</sub>Cl<sub>2</sub> (2 mL) were added *p*-nitrophenol (20.9 mg, 150 μmol) and EDC·HCl (28.8 mg, 150 μmol). The reaction mixture was stirred at room temperature for 17 h and then extracted with CHCl<sub>3</sub>. Purification by silica gel

column chromatography (hexane/ethyl acetate 10:1 v/v) afforded a colorless solid (23.6 mg, 55.9  $\mu\text{mol}$ , 56%).  $R_f = 0.39$  (10/1 hexane/ethyl acetate, v/v),  $^1\text{H NMR}$  (600 MHz,  $\text{CDCl}_3$ ):  $\delta$  8.27 (d,  $J = 12.6$  Hz, 2H), 7.27 (d,  $J = 12.6$  Hz, 2H), 3.25 (t,  $J = 8.6$  Hz, 2H), 2.59 (t,  $J = 9.1$  Hz, 2H), 1.78-1.74 (m, 2H), 1.62-1.57 (m, 2H), 1.40-1.26 (m, 22H), HRMS ( $m/z$ ):  $[\text{M} + \text{Na}]^+$  calcd for  $\text{C}_{22}\text{H}_{34}\text{N}_4\text{NaO}_4^+$ , 441.2472; found, 441.2483.

### Synthesis of lysoSM (3)

A solution of egg sphingomyelin (50.4 mg, 71.7  $\mu\text{mol}$ ) in hydrochloric acid methanolic solution (0.5M, 2.5 mL) was stirred at 50  $^\circ\text{C}$  for 2 days and then the solvent was removed by evaporation. Purification by silica gel column chromatography ( $\text{CHCl}_3/\text{MeOH}/\text{NH}_4\text{OH}$  4:6:1 v/v) afforded a colorless solid (13.4 mg, 28.8  $\mu\text{mol}$ , 40%).  $R_f = 0.14$  (65/35/8  $\text{CHCl}_3/\text{MeOH}/\text{NH}_4\text{OH}$ , v/v),  $^1\text{H NMR}$  (600 MHz,  $\text{CD}_3\text{OD}$ ):  $\delta$  5.81-5.76 (m, 1H), 5.39 (q,  $J = 7.3$  Hz, 1H), 4.51 (s, 1H), 4.18 (q,  $J = 6.2$  Hz, 3H), 4.06-3.90 (m, 2H), 3.56 (t,  $J = 4.5$  Hz, 2H), 3.13 (s, 9H), 2.01 (q,  $J = 6.9$  Hz, 2H), 1.33-1.19 (m, 24H), 0.80 (t,  $J = 6.9$  Hz, 3H), HRMS ( $m/z$ ):  $[\text{M} + \text{H}]^+$  calcd for  $\text{C}_{23}\text{H}_{50}\text{N}_2\text{O}_5\text{P}^+$ , 465.3452; found, 465.3479.  $[\text{M} + \text{Na}]^+$  calcd for  $\text{C}_{23}\text{H}_{49}\text{N}_2\text{NaO}_5\text{P}^+$ , 487.3271; found, 487.3300.

### Synthesis of azidoSM (4)

To a mixture of the lysoSM (3) (13.4 mg, 28.8  $\mu\text{mol}$ ) dissolved in  $\text{CH}_2\text{Cl}_2$  (1 ml) and triethylamine (6.0  $\mu\text{L}$ , 43.3  $\mu\text{mol}$ ) was added 16-hexadecanoic acid NHS ester (2) (18.1 mg, 43.3  $\mu\text{mol}$ ). The reaction mixture was stirred at room temperature for 1 day and then extracted with  $\text{CHCl}_3$ . Purification by silica gel column chromatography ( $\text{CHCl}_3/\text{MeOH}/\text{NH}_4\text{OH}$  65:35:3 v/v) afforded a colorless solid (16.2 mg, 21.6  $\mu\text{mol}$ , 75%).  $R_f = 0.20$  (65/35/3  $\text{CHCl}_3/\text{MeOH}/\text{NH}_4\text{OH}$ , v/v),  $^1\text{H NMR}$  (600 MHz,  $\text{CD}_3\text{OD}$ ):  $\delta$  5.64 (td,  $J = 14.4, 6.9$  Hz, 1H), 5.38 (q,  $J = 7.6$  Hz, 1H), 4.23 (d,  $J = 27.5$  Hz, 2H), 4.05-3.88 (m, 3H), 3.57 (d,  $J = 2.7$  Hz, 2H), 3.15 (s, 9H), 2.19-2.07 (m, 2H), 1.94 (d,  $J = 34.4$  Hz, 2H), 1.51 (q,  $J = 7.1$  Hz, 4H), 1.23-1.22 (m, 48H), 0.83 (t,  $J = 6.9$  Hz, 3H), HRMS ( $m/z$ ):  $[\text{M} + \text{Na}]^+$  calcd for  $\text{C}_{39}\text{H}_{78}\text{N}_5\text{NaO}_6\text{P}^+$ , 766.5582; found, 766.5567.

### Synthesis of aminoSM (5)

To a solution of the azidoSM (4) (16.2 mg, 21.8  $\mu\text{mol}$ ) in DMF (1 mL) were added triphenyl phosphine (17.1 mg, 65.3  $\mu\text{mol}$ ) and water (100  $\mu\text{L}$ ). The reaction mixture was stirred at room temperature for 2 days and then extracted with  $\text{CHCl}_3$ . Purification by silica gel column chromatography ( $\text{CHCl}_3/\text{MeOH}/\text{NH}_4\text{OH}$  1:1:0.2 v/v) afforded a white solid (5.2 mg, 7.2  $\mu\text{mol}$ , 33%).  $R_f = 0.26$  (1/1/0.2  $\text{CHCl}_3/\text{MeOH}/\text{NH}_4\text{OH}$ , v/v),  $^1\text{H NMR}$  (600 MHz,  $\text{CD}_3\text{OD}$ ):  $\delta$  5.70-5.66 (m, 1H), 5.42 (q,  $J = 7.6$  Hz, 1H), 4.35-4.25 (m, 2H), 4.10-3.89 (m, 3H), 3.61 (t,  $J = 4.5$  Hz, 2H), 3.20 (s, 9H), 2.74 (t,  $J = 7.6$  Hz, 2H), 2.20-2.12 (m, 2H), 2.01 (d,  $J = 5.2$  Hz, 2H), 1.57-1.18 (m, 48H), 0.88 (t,  $J = 7.2$  Hz, 3H), HRMS ( $m/z$ ):  $[\text{M} + \text{H}]^+$  calcd for  $\text{C}_{39}\text{H}_{81}\text{N}_3\text{O}_6\text{P}^+$ , 718.5858; found,

718.5929.

### Synthesis of azidoCer (6)

To a solution of *D-erythro*-sphingosine (10 mg, 33.4  $\mu\text{mol}$ ) in  $\text{CH}_2\text{Cl}_2/\text{DMF}$  (2:1, v/v, 2 mL) were added 16-hexadecanoic acid NHS ester (**2**) (21.0 mg, 50.0  $\mu\text{mol}$ ) and triethylamine (7.0  $\mu\text{L}$ , 50.0  $\mu\text{mol}$ ). The mixture was stirred at room temperature for 1 day and then extracted with  $\text{CHCl}_3$ . Purification by silica gel column chromatography ( $\text{CHCl}_3/\text{MeOH}$  30:1 v/v) afforded a colorless solid (12.6 mg, 13.0  $\mu\text{mol}$ , 39%).  $R_f = 0.28$  (30/1  $\text{CHCl}_3/\text{MeOH}$ , v/v),  $^1\text{H NMR}$  (600 MHz,  $\text{CDCl}_3$ ):  $\delta$  6.24 (d,  $J = 7.6$  Hz, 1H), 5.79-5.75 (m, 1H), 5.52 (dd,  $J = 15.8, 6.2$  Hz, 1H), 4.31 (d,  $J = 4.1$  Hz, 1H), 3.96-3.88 (m, 2H), 3.70-3.63 (m, 1H), 3.24 (t,  $J = 7.2$  Hz, 2H), 2.21 (q,  $J = 7.1$  Hz, 2H), 2.06-2.00 (m, 2H), 1.65-1.56 (m, 6H), 1.39-1.24 (m, 44H), 0.86 (t,  $J = 6.9$  Hz, 3H), HRMS ( $m/z$ ):  $[\text{M} + \text{Na}]^+$  calcd for  $\text{C}_{34}\text{H}_{66}\text{N}_4\text{NaO}_3^+$ , 601.5027; found, 601.5020.

### Synthesis of aminoCer (7)

To a solution of the azidoCer (**6**) (12.6 mg, 21.8  $\mu\text{mol}$ ) in THF (1 mL) were added triphenyl phosphine (17.1 mg, 65.3  $\mu\text{mol}$ ) and water (20  $\mu\text{L}$ ). The reaction mixture was stirred at room temperature for 2 days and then extracted with  $\text{CHCl}_3$ . Purification by silica gel column chromatography ( $\text{CHCl}_3/\text{MeOH}/\text{NH}_4\text{OH}$  40:20:4 v/v) afforded a white solid (5.8 mg, 10.5  $\mu\text{mol}$ , 48%).  $R_f = 0.39$  (40/20/4  $\text{CHCl}_3/\text{MeOH}/\text{NH}_4\text{OH}$ , v/v),  $^1\text{H NMR}$  (600 MHz,  $\text{CDCl}_3$ ):  $\delta$  6.27 (d,  $J = 6.9$  Hz, 1H), 5.79-5.74 (m, 1H), 5.52 (dd,  $J = 15.5, 6.5$  Hz, 1H), 4.29 (s, 1H), 3.95-3.88 (m, 2H), 3.68 (dd,  $J = 11.7, 3.4$  Hz, 1H), 2.66 (t,  $J = 7.2$  Hz, 2H), 2.23-2.16 (m, 2H), 2.06-1.99 (m, 2H), 1.63 (q,  $J = 7.3$  Hz, 4H), 1.42-1.24 (m, 44H), 0.86 (t,  $J = 6.9$  Hz, 3H), HRMS ( $m/z$ ):  $[\text{M} + \text{H}]^+$  calcd for  $\text{C}_{34}\text{H}_{69}\text{N}_2\text{O}_3^+$ , 553.5303; found, 553.5353.



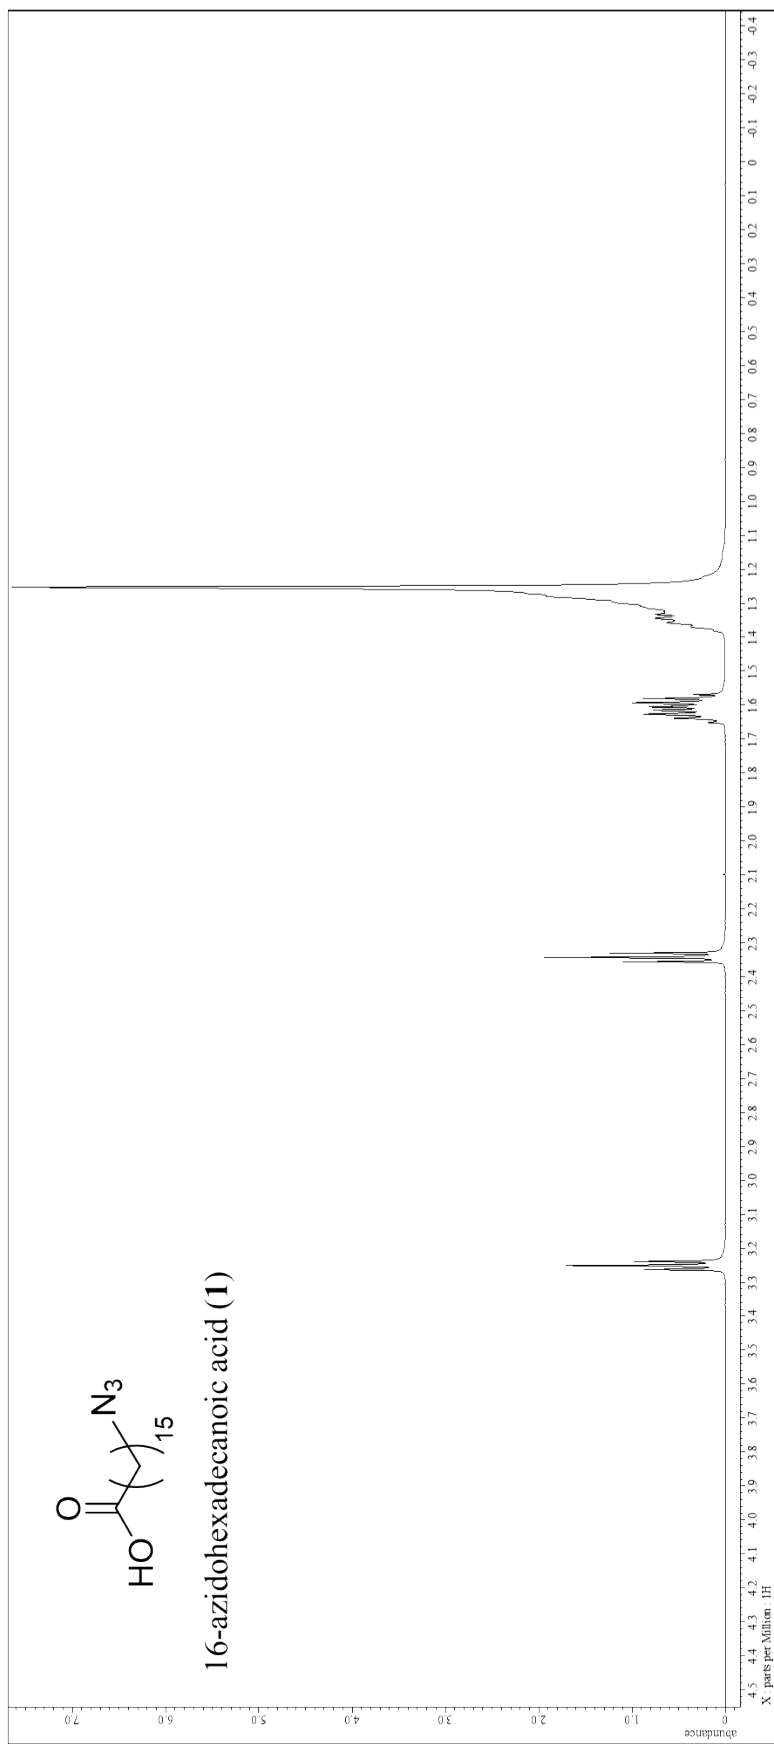

**Fig. S2** 600 MHz <sup>1</sup>H NMR spectrum of 16-azidohexadecanoic acid (**1**)

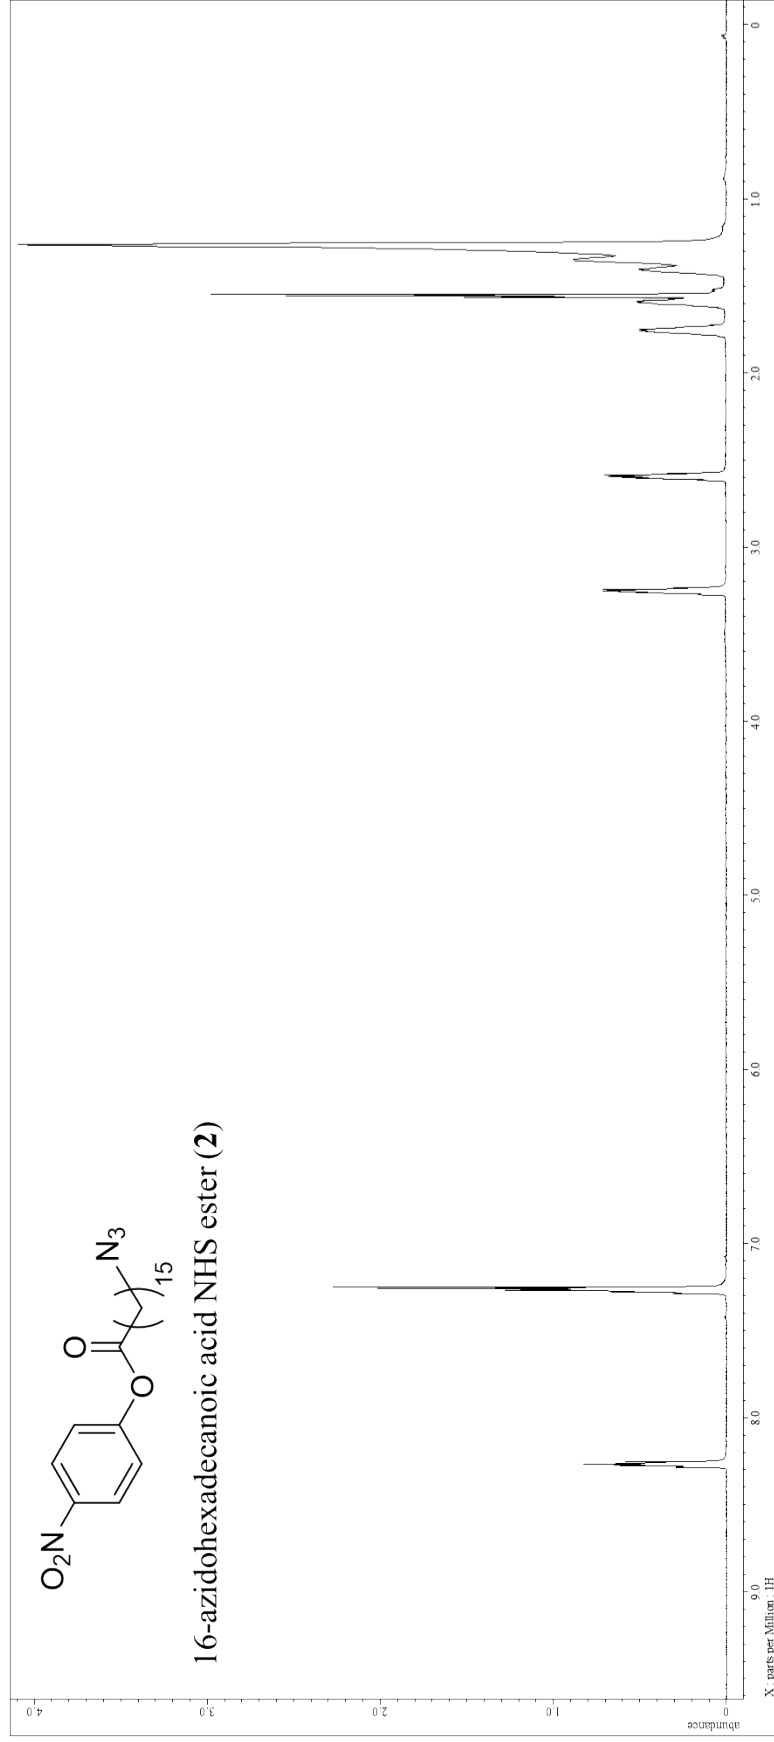

**Fig. S3** 600 MHz  $^1\text{H}$  NMR spectrum of 16-azidoheptanoic acid NHS ester (**2**)

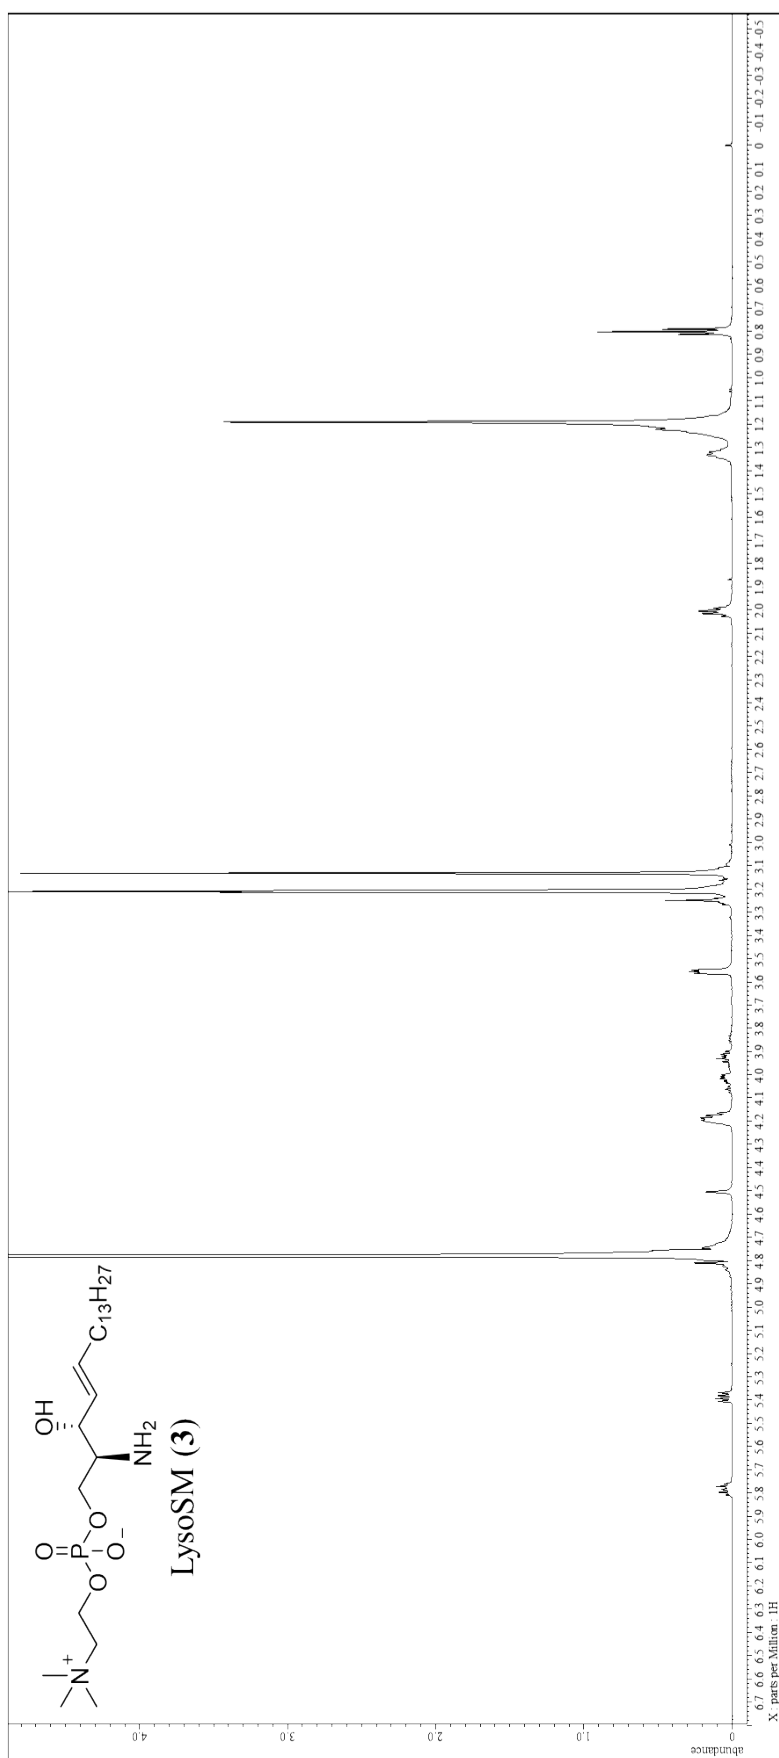

Fig. S4 600 MHz <sup>1</sup>H NMR spectrum of lysoSM (3)

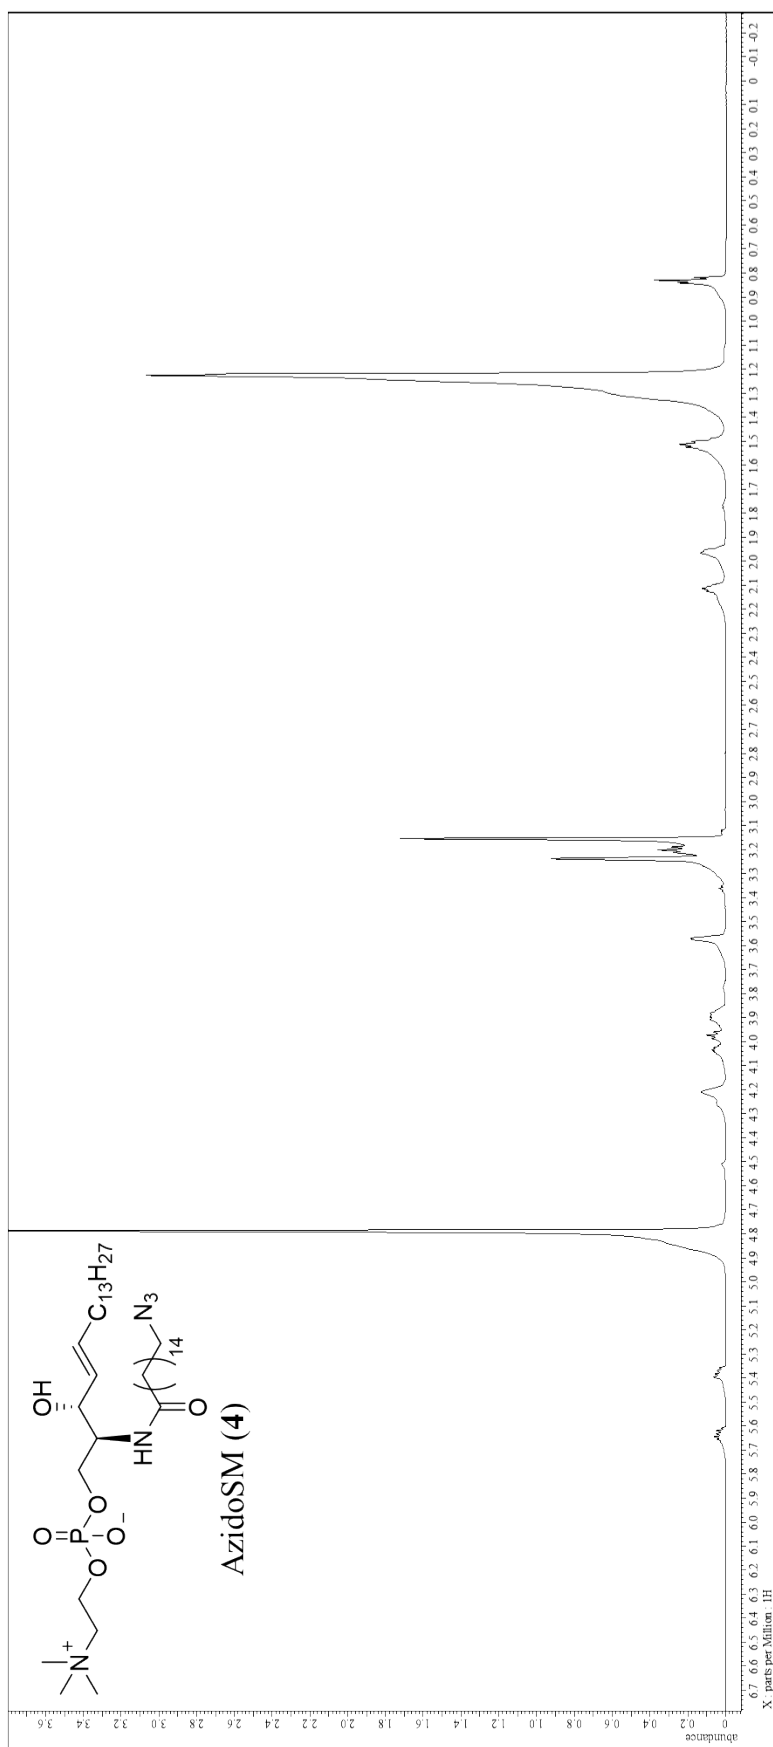

**Fig. S5** 600 MHz <sup>1</sup>H NMR spectrum of azidoSM (4)

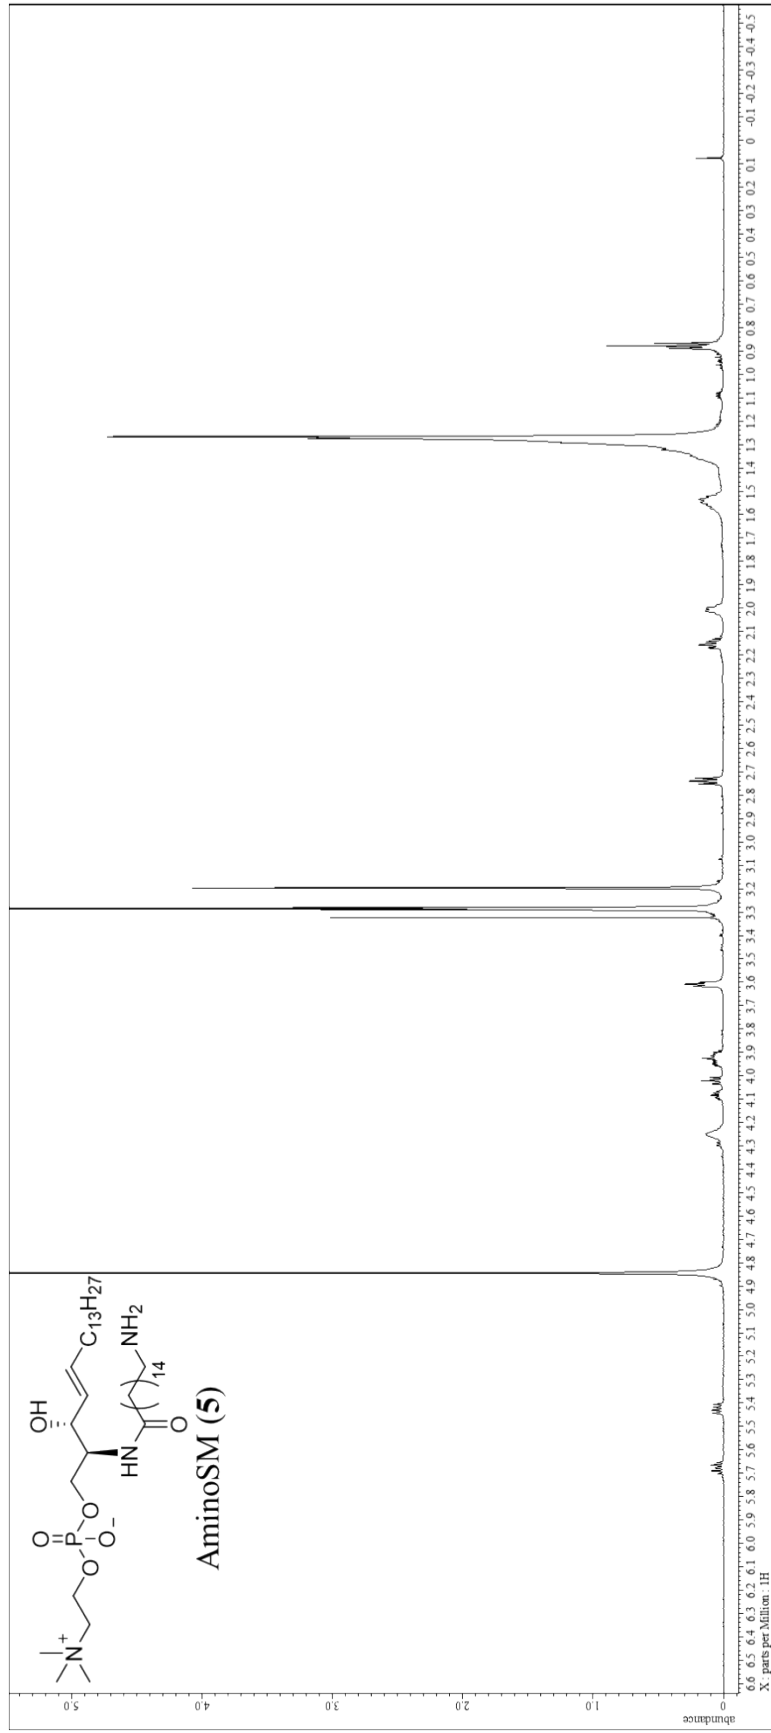

**Fig. S6** 600 MHz <sup>1</sup>H NMR spectrum of aminoSM (5)

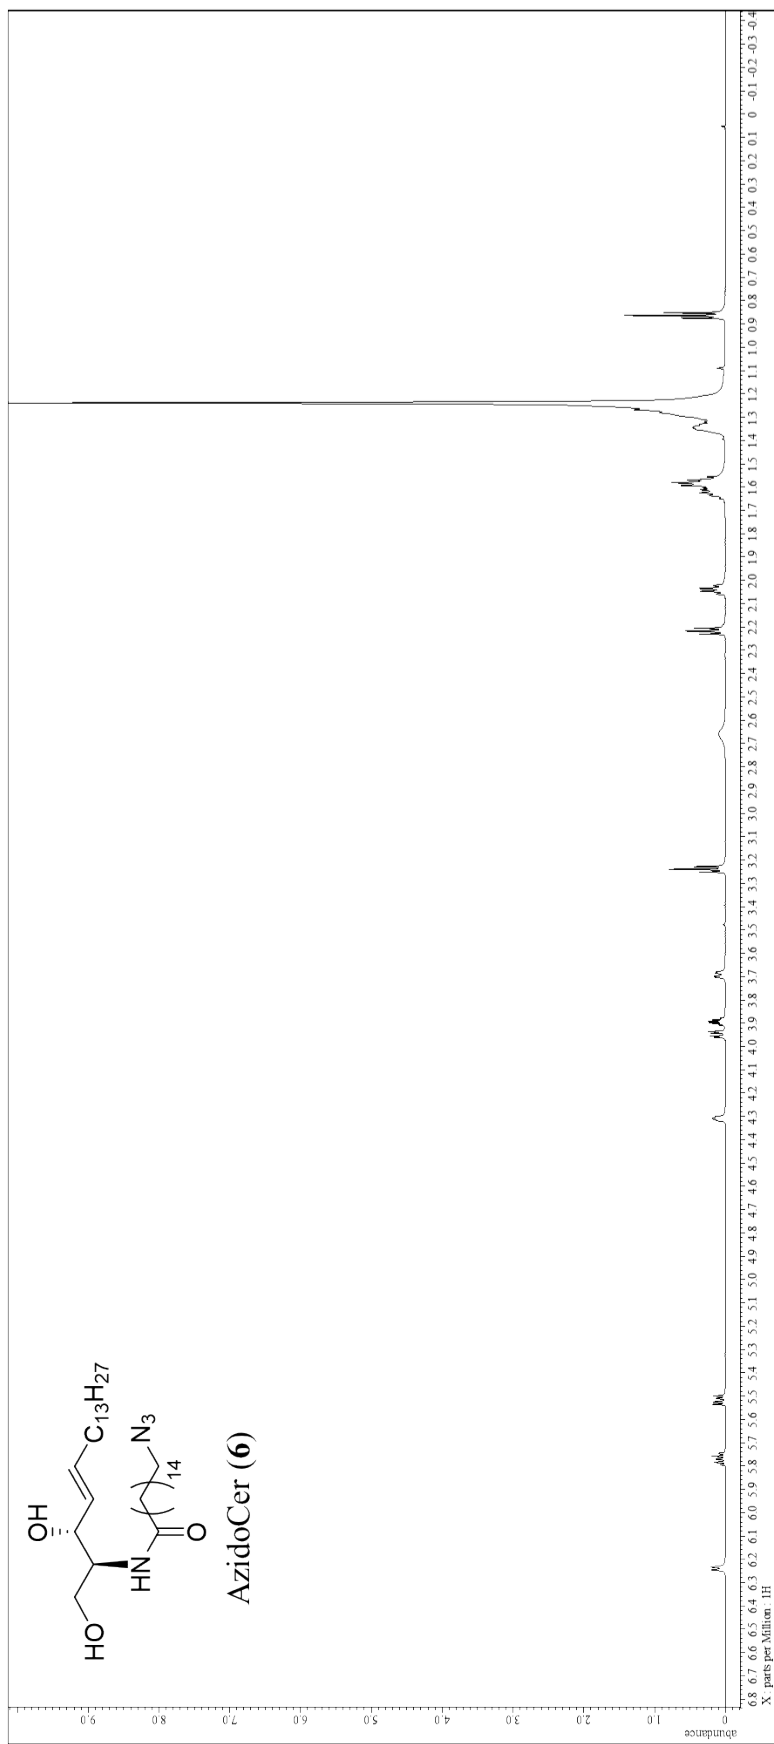

**Fig. S7** 600 MHz <sup>1</sup>H NMR spectrum of azidoCer (6)

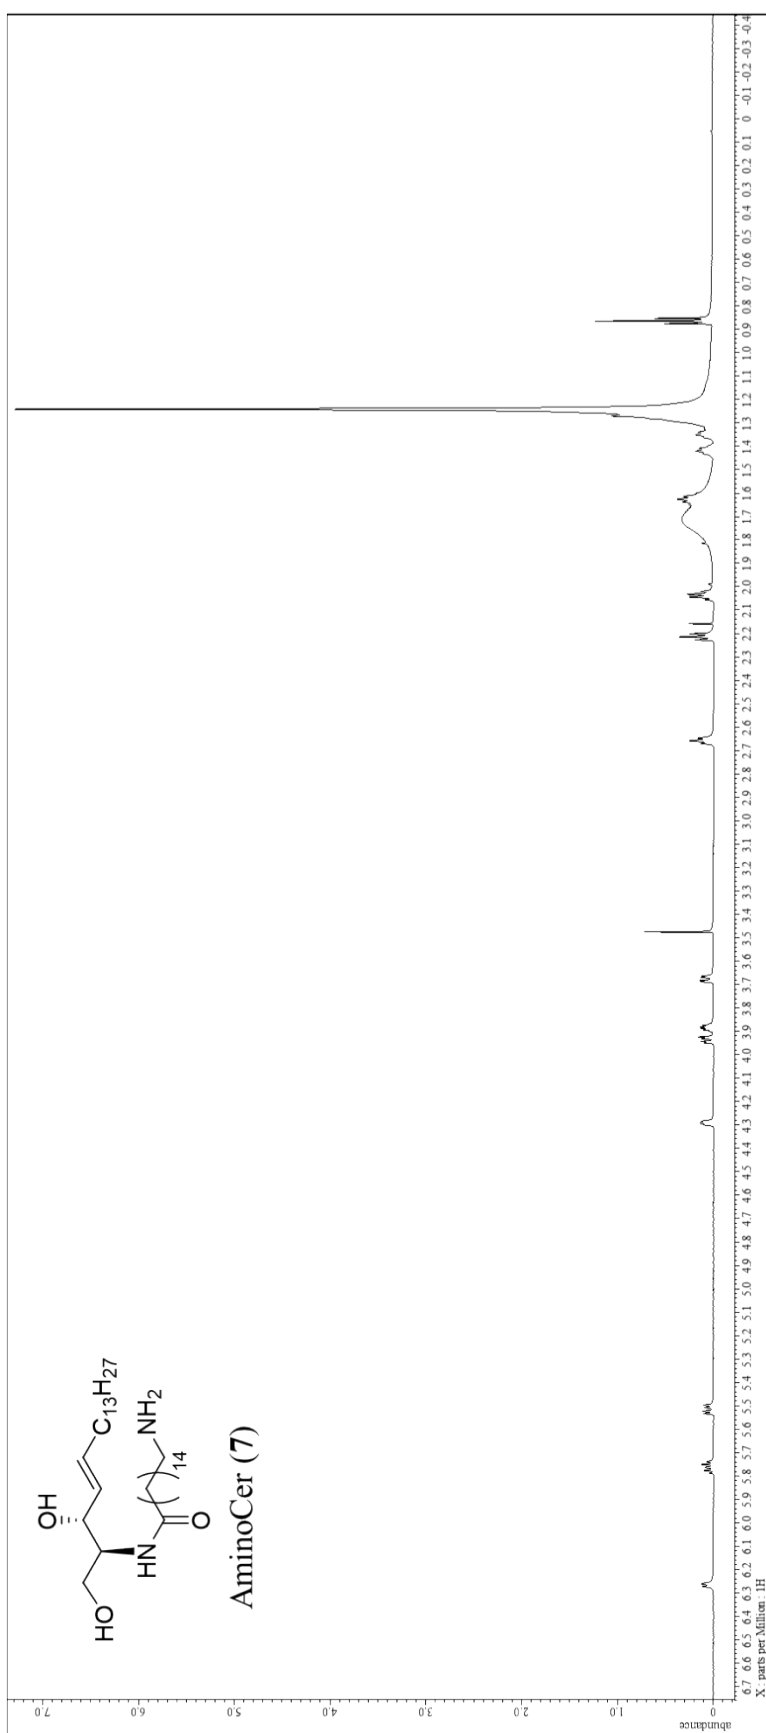

**Fig. S8** 600 MHz <sup>1</sup>H NMR spectrum of aminoCer (7)
